# Supplementary material for: Essential Oils as a Good Weapon against Drug-Resistant Candida auris
Source: MDPI journal article supplement (doi:10.3390/antibiotics11070977), 2022-07-20
Supplement: s1 [file s1]

## Supplementary Material

### 1. Adaptation of the Essential Oil Analysis Bulletins provided by the company florame® (Saint-Rémy-de-Provence, France).

#### 1.1 Tea Tree Essential Oil Analysis Report Lot 903025

##### Identification:

- **Name (International Nomenclature of Cosmetic Ingredients (INCI)/CTFA):** *Melaleuca alternifolia* (Tea tree) leaf oil
- **Latin name:** *Melaleuca alternifolia*
- **N° CAS:** 85085-48-9
- **N° EINECS (European Inventory of Existing Commercial Chemical Substances):** 285-377-1

##### General characteristics:

- **Botanical family:** Myrtaceae
- **Product acquisition:** Steam distillation of leaves and terminal branches
- **Main molecules :** Terpinen-4-ol,  $\gamma$ -terpinene,  $\alpha$ -terpinene
- **Shelf life:** Contains no preservatives, can be stored in its original state away from light, air and heat according to the best before end (BBE).

##### Lot characteristics:

- **Origin:** South Africa
- **Quality:** Organic (certified by Ecocert SAS F32600)
- **Texture / Color / Odor:** Clear fluid liquid / colorless / characteristic
- **Refractive index (20°C):** 1.4775
- **Density (20°C):** 0.893
- **Rotary power (20°C):** 9.9°

##### Lot information:

- **Distillation date:** 12/2018
- **BBE:** 12/2023

##### Chromatographic analysis conditions:

- **Device:** GC with dual FID detection
- **Carrier gas:** Hydrogen
- **Polar column:** Elite Vax (100% polyethylene glycol) 60 m / 0.25 mm / 0.25  $\mu$ m
- **Nonpolar Column:** Elite 5 (5% diphenyl 95% dimethylpolysiloxane) 60 m/0.25 mm/0.25  $\mu$ m

Analysis date: 03/09/2019

## Chromatographic profiles:

- Polar column analysis results**

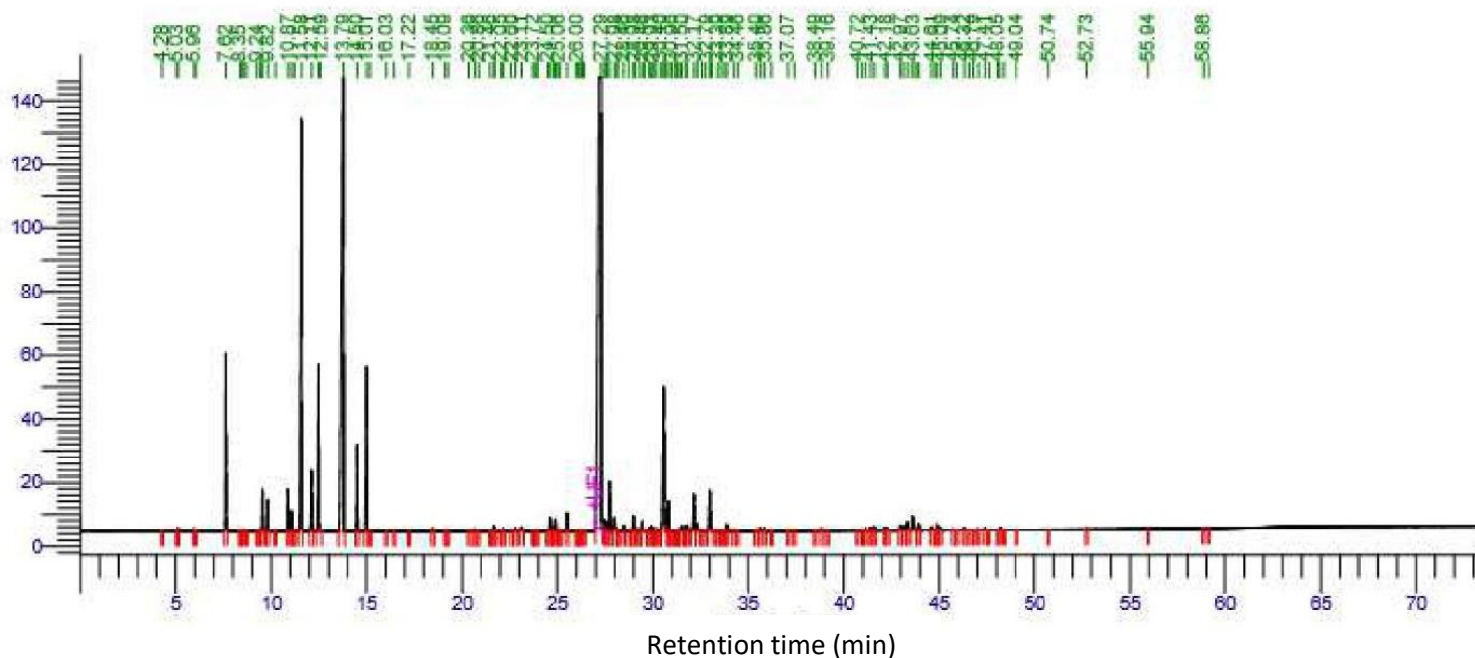

| Order peaks | Molecules name                 | Retention time (min) | Area (uV*sec) | Area (%) | Order peaks | Molecules name           | Retention time (min) | Area (uV*sec) | Area (%) |
|-------------|--------------------------------|----------------------|---------------|----------|-------------|--------------------------|----------------------|---------------|----------|
| 6           | ALPHA THUYENE+ALPHA PINENE     | 7.621                | 174708.63     | 3.23     | 48          | ALPHA GURGUJENE          | 24.626               | 13106.23      | 0.24     |
| 13          | BETA PINENE                    | 9.537                | 35106.71      | 0.65     | 49          |                          | 24.798               | 2908.32       | 0.05     |
| 14          | MYRCENE                        | 9.816                | 25279.06      | 0.47     | 50          |                          | 24.914               | 12694.02      | 0.23     |
| 16          | ALPHA PHELLANDRENE             | 10.874               | 38765.73      | 0.72     | 53          | LINALOL                  | 25.510               | 19292.58      | 0.36     |
| 17          |                                | 11.063               | 18977.32      | 0.35     | 59          | TERPINENE-4-OL           | 27.292               | 2304102.68    | 42.54    |
| 19          | ALPHA TERPINENE                | 11.580               | 554375.94     | 10.24    | 60          |                          | 27.445               | 9472.94       | 0.17     |
| 20          | LIMONENE                       | 12.108               | 56530.77      | 1.04     | 61          |                          | 27.578               | 8815.55       | 0.16     |
| 21          | 1.8 cineole + beta phellandren | 12.496               | 199528.39     | 3.68     | 62          | TRANS BETA CARYOPHYLLENE | 27.720               | 47390.94      | 0.87     |
| 23          | GAMMA TERPINENE                | 13.790               | 1171977.05    | 21.64    | 63          |                          | 27.982               | 18393.72      | 0.34     |
| 24          | PARA CYMENE                    | 14.505               | 78064.17      | 1.44     | 66          |                          | 28.456               | 5128.79       | 0.09     |
| 25          | TERPINOLENE                    | 15.011               | 182273.45     | 3.37     | 68          | AROMADENDRENE            | 28.978               | 16387.62      | 0.30     |
| 37          |                                | 21.650               | 4934.52       | 0.09     | 69          |                          | 29.064               | 3199.68       | 0.06     |
| 43          |                                | 23.110               | 4023.26       | 0.07     | 71          | ALLOAROMADENDRENE        | 29.464               | 10698.07      | 0.20     |
|             |                                |                      |               |          | 73          |                          | 29.818               | 2822.20       | 0.05     |
|             |                                |                      |               |          | 74          |                          | 29.932               | 4384.49       | 0.08     |
|             |                                |                      |               |          | 78          | ALPHA TERPINEOL          | 30.567               | 175826.61     | 3.25     |
|             |                                |                      |               |          | 79          |                          | 30.660               | 7470.76       | 0.14     |
|             |                                |                      |               |          | 80          | LEDENE                   | 30.812               | 34932.93      | 0.64     |
|             |                                |                      |               |          | 85          |                          | 31.498               | 4692.54       | 0.09     |
|             |                                |                      |               |          | 86          |                          | 31.687               | 4870.87       | 0.09     |
|             |                                |                      |               |          | 87          |                          | 31.799               | 8641.04       | 0.16     |
|             |                                |                      |               |          | 88          |                          | 32.167               | 40120.63      | 0.74     |
|             |                                |                      |               |          | 89          | B SELINENE               | 32.322               | 7412.44       | 0.14     |
|             |                                |                      |               |          | 92          | DELTA CADINENE           | 33.007               | 46889.96      | 0.87     |
|             |                                |                      |               |          | 97          |                          | 33.886               | 6256.89       | 0.12     |
|             |                                |                      |               |          | 101         |                          | 35.628               | 2582.23       | 0.05     |
|             |                                |                      |               |          | 113         |                          | 41.623               | 3409.67       | 0.06     |
|             |                                |                      |               |          | 116         |                          | 42.971               | 5437.12       | 0.10     |
|             |                                |                      |               |          | 117         |                          | 43.126               | 4489.82       | 0.08     |
|             |                                |                      |               |          | 118         |                          | 43.345               | 8506.54       | 0.16     |
|             |                                |                      |               |          | 119         | GLOBULOL                 | 43.629               | 15393.76      | 0.28     |
|             |                                |                      |               |          | 121         | VIRIDIFLOROL             | 43.928               | 7175.49       | 0.13     |
|             |                                |                      |               |          | 122         |                          | 44.614               | 3101.44       | 0.06     |
|             |                                |                      |               |          | 124         |                          | 44.903               | 5668.28       | 0.10     |
|             |                                |                      |               |          |             |                          | 1288.910             | 5416221.91    | 100.00   |

- Nonpolar column analysis results

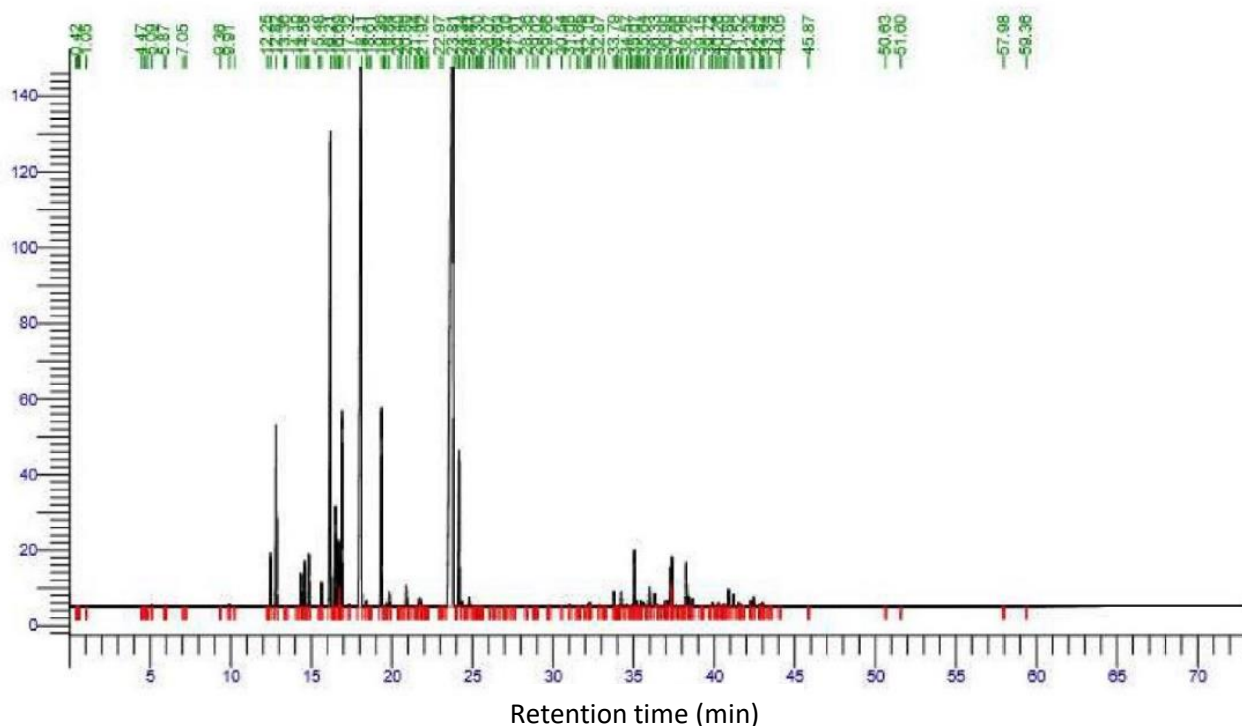

| Order peaks | Molecules name           | Retention time (min) | Area (uV*sec) | Area (%) |
|-------------|--------------------------|----------------------|---------------|----------|
| 18          | ALPHA THUYENE            | 12.457               | 38299.14      | 0.71     |
| 19          | ALPHA PINENE             | 12.819               | 135751.17     | 2.52     |
| 23          | SABINENE                 | 14.344               | 25385.25      | 0.47     |
| 24          | BETA PINENE              | 14.578               | 35441.41      | 0.66     |
| 26          | MYRCENE                  | 14.856               | 39017.45      | 0.72     |
| 28          | ALPHA PHELLANDRENE       | 15.621               | 19700.14      | 0.37     |
| 29          | ALPHA TERPINENE          | 16.206               | 548966.31     | 10.19    |
| 31          | PARA CYMENE              | 16.493               | 80344.96      | 1.49     |
| 32          | LIMONENE                 | 16.688               | 58398.53      | 1.08     |
| 33          | BETA PHELLANDRENE        | 16.763               | 36761.26      | 0.68     |
| 34          | 1,8-CINEOLE              | 16.904               | 163213.77     | 3.03     |
| 35          |                          | 17.324               | 2588.68       | 0.05     |
| 36          | GAMMA TERPINENE          | 18.108               | 1151919.23    | 21.38    |
| 37          |                          | 18.424               | 5192.96       | 0.10     |
| 40          | TERPINOLENE              | 19.365               | 186181.18     | 3.46     |
| 42          |                          | 19.657               | 2961.01       | 0.05     |
| 43          |                          | 19.837               | 12369.57      | 0.23     |
| 46          | LINALOL                  | 20.891               | 19478.89      | 0.36     |
| 50          |                          | 21.741               | 13795.86      | 0.26     |
| 51          |                          | 21.829               | 3605.85       | 0.07     |
| 57          | TERPINEN-4-OL            | 23.810               | 2273456.35    | 42.20    |
| 59          | ALPHA TERPINEOL          | 24.176               | 174851.30     | 3.25     |
| 60          | ALPHA COPAENE            | 24.343               | 5309.95       | 0.10     |
| 62          |                          | 24.813               | 7490.93       | 0.14     |
| 87          |                          | 32.286               | 3013.81       | 0.06     |
| 92          | ALPHA GURJUNENE          | 33.788               | 13362.52      | 0.25     |
| 96          | TRANS BETA CARYOPHYLLENE | 34.249               | 13469.54      | 0.25     |
| 100         | AROMADENDRENE            | 35.069               | 53710.14      | 1.00     |
| 101         |                          | 35.192               | 4590.32       | 0.09     |
| 103         |                          | 35.451               | 4960.53       | 0.09     |
| 104         |                          | 35.645               | 4202.51       | 0.08     |
| 106         | ALLOAROMADENDRENE        | 35.970               | 17044.86      | 0.32     |
| 107         |                          | 36.333               | 12709.77      | 0.24     |
| 111         |                          | 36.990               | 4829.62       | 0.09     |
| 112         |                          | 37.085               | 8570.32       | 0.16     |
| 113         | LEDENE                   | 37.302               | 44215.27      | 0.82     |
| 114         | BICYCLOGERMACRENE        | 37.388               | 45525.47      | 0.85     |
| 119         | DELTA CADINENE           | 38.276               | 42044.94      | 0.78     |
| 120         |                          | 38.422               | 8865.37       | 0.16     |
| 121         |                          | 38.681               | 6841.61       | 0.13     |
| 125         |                          | 39.902               | 4160.48       | 0.08     |
| 127         |                          | 40.259               | 3170.96       | 0.06     |
| 131         | GLOBULOL                 | 40.887               | 15687.58      | 0.29     |
| 132         | VIRIDIFLOROL             | 41.218               | 13036.92      | 0.24     |
| 133         |                          | 41.525               | 2967.01       | 0.06     |
| 136         |                          | 42.296               | 5763.16       | 0.11     |
| 137         |                          | 42.444               | 8740.30       | 0.16     |
| 139         |                          | 42.977               | 4836.16       | 0.09     |
|             |                          | 1351.683             | 5386800.33    | 100.00   |

## 1.2 Cajeput Essential Oil Analysis Report Lot 801736

### Identification:

- **Name (INCI/CTFA):** *Melaleuca leucadendra* Cajeput oil
- **Latin name:** *Melaleuca cajaputi*
- **N° CAS :** 85480-37-1
- **N° EINECS:** 287-316-4

### General characteristics:

- **Botanical family:** Myrtaceae
- **Product acquisition:** Steam distillation of organic cajeput leaves
- **Main molecules:** 1,8-cineole,  $\alpha$ -terpineol, Terpinolene
- **Allergens:** Limonene, linalool, geraniol
- **Shelf life:** Contains no preservatives, can be stored in its original state away from light, air and heat according to the BBE. (5 years from the date of distillation)

### Lot characteristics:

- **Origin:** South Africa
- **Quality:** Organic (certified by Ecocert SAS F32600)
- **Texture / Color / Odor:** Clear liquid/ pale yellow/ nice fresh
- **Refractive index (20°C):** 1.4676
- **Density (20°C):** 0,914
- **Rotary power (20°C):** -1.2°

### Lot information:

- **Distillation date:** 09/2017
- **BBE:** 09/2022

### Chromatographic analysis conditions:

- **Device:** GC with dual FID detection
- **Carrier gas:** Hydrogen
- **Polar column:** Elite Vax (100% polyethylene glycol) 60 m / 0.25 mm / 0.25  $\mu$ m
- **Nonpolar Column:** Elite 5 (5% diphenyl 95% dimethylpolysiloxane) 60 m/0.25 mm/0.25  $\mu$ m

Analysis date: 12/02/2019

## Chromatographic profiles:

- Polar column analysis results**

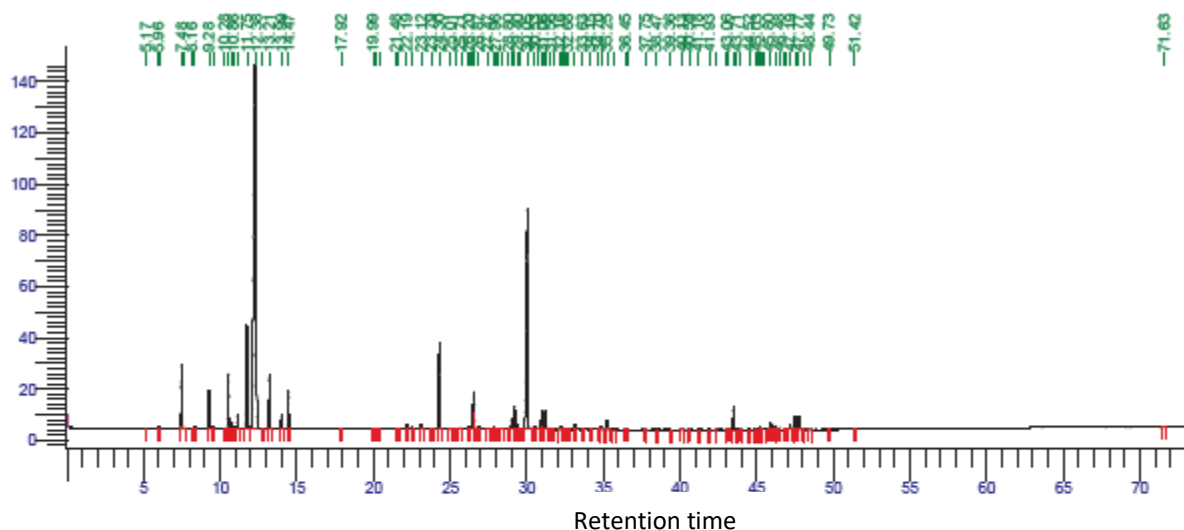

- Nonpolar column analysis results

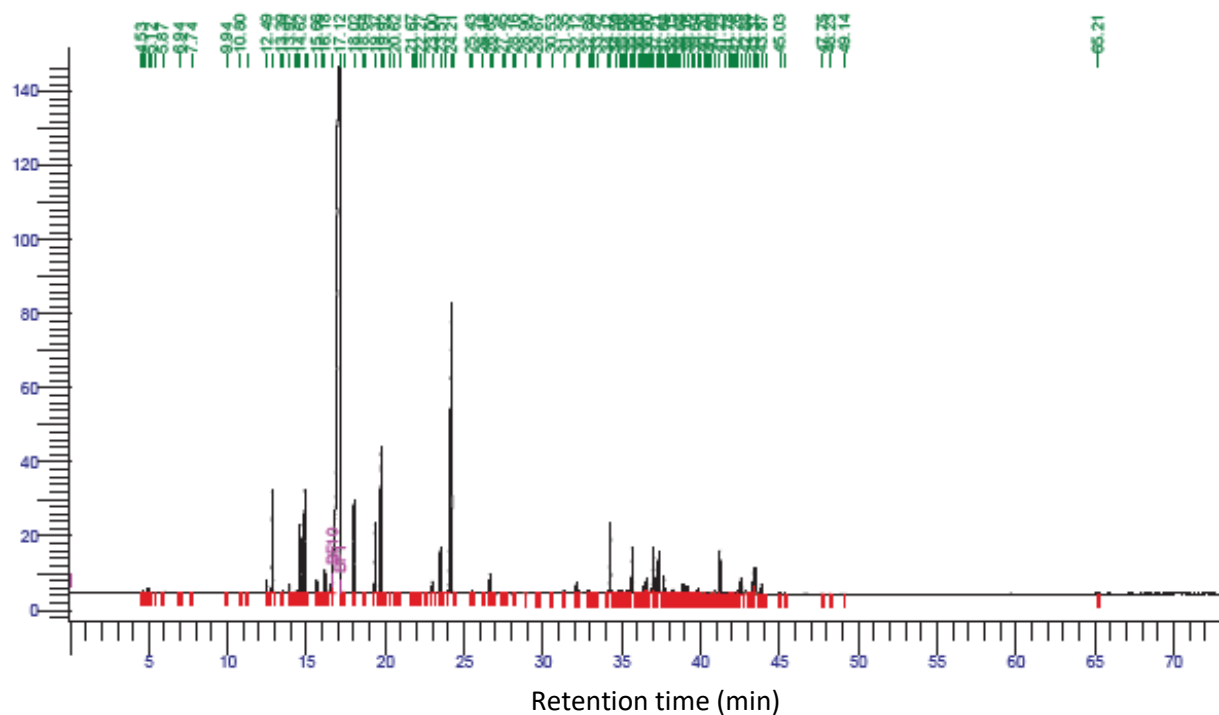

| Order peaks | Molecules name     | Retention time (min) | Area (uV*sec) | Area (%) | Order peaks | Molecules name         | Retention time (min) | Area (uV*sec) | Area (%) |
|-------------|--------------------|----------------------|---------------|----------|-------------|------------------------|----------------------|---------------|----------|
| 14          | ALPHA THUYENE      | 12.487               | 9033.82       | 0.20     | 45          | TERPINEN-4-OL          | 23.513               | 41001.50      | 0.91     |
| 15          | ALPHA PINENE       | 12.846               | 76696.78      | 1.71     | 47          | ALPHA TERPINEOL        | 24.214               | 503307.28     | 11.19    |
| 18          | BENZALDEHYDE       | 13.924               | 7044.73       | 0.16     | 52          |                        | 26.649               | 16114.28      | 0.36     |
| 21          | SABINENE           | 14.618               | 55361.99      | 1.23     | 62          |                        | 31.347               | 2917.49       | 0.06     |
| 22          | MYRCENE            | 14.900               | 81407.53      | 1.81     | 63          | ACETATE DE GERANYLE    | 32.122               | 11159.22      | 0.25     |
| 24          | ALPHA PHELLANDRENE | 15.657               | 11717.37      | 0.26     | 65          | ALPHA COPAENE          | 32.887               | 2836.07       | 0.06     |
| 26          | ALPHA TERPINENE    | 16.180               | 24474.28      | 0.54     | 70          |                        | 34.280               | 66868.64      | 1.49     |
| 27          | PARA CYMENE        | 16.597               | 19413.07      | 0.43     | 72          |                        | 34.853               | 2884.59       | 0.06     |
| 28          | CINEOLE            | 17.124               | 2916315.41    | 64.83    | 75          |                        | 35.350               | 4473.88       | 0.10     |
| 30          | GAMMA TERPINENE    | 18.022               | 76858.90      | 1.71     | 76          |                        | 35.564               | 3046.56       | 0.07     |
| 33          | TERPINOLENE        | 19.368               | 58775.31      | 1.31     | 77          | ALPHA CARYOPHYLLENE    | 35.673               | 41300.17      | 0.92     |
| 34          | LINALOL            | 19.737               | 147078.71     | 3.27     | 83          |                        | 36.430               | 7138.92       | 0.16     |
| 44          | BORNEOL            | 22.999               | 11096.17      | 0.25     | 84          |                        | 36.511               | 9610.44       | 0.21     |
|             |                    |                      |               |          | 85          | D GERMACRENE           | 36.602               | 14717.22      | 0.33     |
|             |                    |                      |               |          | 87          |                        | 36.917               | 4758.68       | 0.11     |
|             |                    |                      |               |          | 88          | BETA SELINENE          | 37.010               | 57450.39      | 1.28     |
|             |                    |                      |               |          | 89          |                        | 37.207               | 4083.18       | 0.09     |
|             |                    |                      |               |          | 90          | ALPHA SELINENE         | 37.336               | 40054.39      | 0.89     |
|             |                    |                      |               |          | 93          |                        | 37.678               | 17929.24      | 0.40     |
|             |                    |                      |               |          | 97          |                        | 38.258               | 3407.42       | 0.08     |
|             |                    |                      |               |          | 102         |                        | 38.902               | 7708.87       | 0.17     |
|             |                    |                      |               |          | 103         |                        | 39.180               | 6670.64       | 0.15     |
|             |                    |                      |               |          | 107         |                        | 39.828               | 3944.15       | 0.09     |
|             |                    |                      |               |          | 115         | OXYDE DE CARYOPHYLLENE | 41.231               | 39900.20      | 0.89     |
|             |                    |                      |               |          | 123         | 10 EPI GAMMA EUDESMOL  | 42.345               | 4291.27       | 0.10     |
|             |                    |                      |               |          | 124         | ALPHA EUDESMOL         | 42.580               | 24934.28      | 0.55     |
|             |                    |                      |               |          | 127         |                        | 43.369               | 25386.05      | 0.56     |
|             |                    |                      |               |          | 128         | BETA EUDESMOL          | 43.458               | 25799.75      | 0.57     |
|             |                    |                      |               |          | 130         |                        | 43.869               | 9213.11       | 0.20     |
|             |                    |                      |               |          |             |                        | 1269.604             | 4498182.15    | 100.00   |

### 1.3 Niaouli Essential Oil Analysis Report Lot 100378

#### Identification:

- **Name (INCI/CTFA):** *Melaleuca viridiflora* leaf oil
- **Latin name:** *Melaleuca quinquenervia*
- **N° CAS:** 132940-73-9
- **N° EINECS:** 310-217-5

#### General characteristics:

- **Botanical family:** Myrtaceae
- **Product acquisition:** Steam distillation of leaves
- **Main molecules:** 1,8-cineole, Viridiflorol
- **Allergens:** Limonene, linalool, Citronellol
- **Shelf life:** Contains no preservatives, can be kept as is for 5 years away from light, air and heat.

#### Lot characteristics:

- **Origin:** Madagascar
- **Quality:** Organic (certified by Ecocert SAS F32600)
- **Texture / Color / Odor:** Clear fluid liquid / colorless / characteristic
- **Refractive index (20°C):** 1,464
- **Density (20°C):** 0,910

#### Lot information:

- **Distillation date:** 09/2017
- **BBE:** 09/2022

#### Chromatographic analysis conditions:

- **Device:** GC 6890 MS 5975
- **Mass range:** 40-450 uma
- **Column:** HP5ms/ 30 m/ 0.25 mm/ 0.25 µm
- **Injection divided:** 1 EL - ratio 1/200
- **Carrier gas:** Helium / Flow rate: 1 mL/min
- **Oven:** 2°/min, 60-250°C for 5 min
- **Acquisition time:** 100 min

Analysis date: 14/03/11

## Chromatographic profiles:

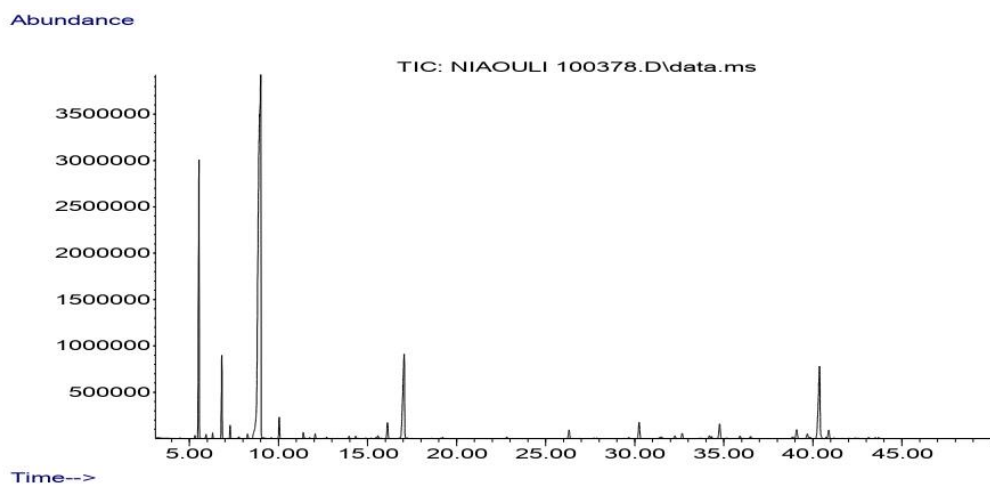

| Identification           | Area (%) |
|--------------------------|----------|
| <b>α</b> -Thuyène        | 0,11     |
| <b>α</b> -Pinène         | 12,00    |
| Camphène                 | 0,18     |
| Benzaldéhyde             | 0,22     |
| <b>β</b> -Pinène         | 3,46     |
| <b>β</b> -Myrcène        | 0,56     |
| <b>α</b> -Phellandrène   | 0,11     |
| <b>α</b> -Terpinène      | 0,26     |
| p-Cymène                 | 57,14    |
| <b>Limonène*</b>         |          |
| 1,8-Cinéole              |          |
| trans- <b>β</b> -Ocimène | 0,04     |
| <b>γ</b> -Terpinène      | 1,04     |
| Terpinolène              | 0,34     |
| Benzoate de méthyle      | 0,05     |
| <b>Linalol*</b>          | 0,24     |
| Alcool fenchylique       | 0,07     |
| Isopulegol               | 0,13     |
| Bornéol                  | 0,06     |
| Terpinèn-4-ol            | 1,01     |
| <b>α</b> -Terpinéol      | 8,55     |
| <b>Citronellol*</b>      | 0,07     |
| Patchoulène              | 0,06     |
| <b>β</b> -Caryophyllène  | 1,22     |
| <b>α</b> -Caryophyllène  | 0,20     |
| Alloaromadendrène        | 0,38     |
| <b>β</b> -Sélinène       | 0,20     |
| Lédène                   | 1,19     |
| <b>γ</b> -Cadinène       | 0,18     |
| <b>δ</b> -Cadinène       | 0,16     |
| Nérolidol                | 0,73     |
| Viridiflorol             | 7,29     |
| Ledol                    | 0,73     |



#### 1.4 White thyme Essential Oil Analysis Report Lot 800180

##### Identification:

- **Name (INCI/CTFA):** *Thymus satureioides* (White thyme) oil
- **Latin name:** *Thymus satureioides*

##### General characteristics:

- **Botanical family:** Lamiaceae
- **Product acquisition:** Steam distillation of flowered tops
- **Main molecules:** Borneol, thymol, carvacrol
- **Allergens:** Limonene, linalool
- **Shelf life:** Contains no preservatives, can be stored in its original state away from light, air and heat according to the BBE. (5 years from the date of distillation)

##### Lot characteristics:

- **Origin:** Morocco
- **Quality:** Organic (certified by Ecocert SAS F32600)
- **Texture / Color / Odor:** Clear liquid/light yellow/characteristic
- **Refractive index (20°C):** 1,4843
- **Density (20°C):** 0,938
- **Rotary power (20°C):** -6.0°

##### Lot information:

- **Distillation date:** 06/2016
- **BBE:** 06/2022

##### Chromatographic analysis conditions:

- **Device:** GC with dual FID detection
- **Carrier gas:** Hydrogen
- **Polar column:** Elite Vax (100% polyethylene glycol) 60 m / 0.25 mm / 0.25 µm
- **Nonpolar Column:** Elite 5 (5% diphenyl 95% dimethylpolysiloxane) 60 m/0.25 mm/0.25 µm

Analysis date: 19/01/2018

## Chromatographic profiles:

- Polar column analysis results**

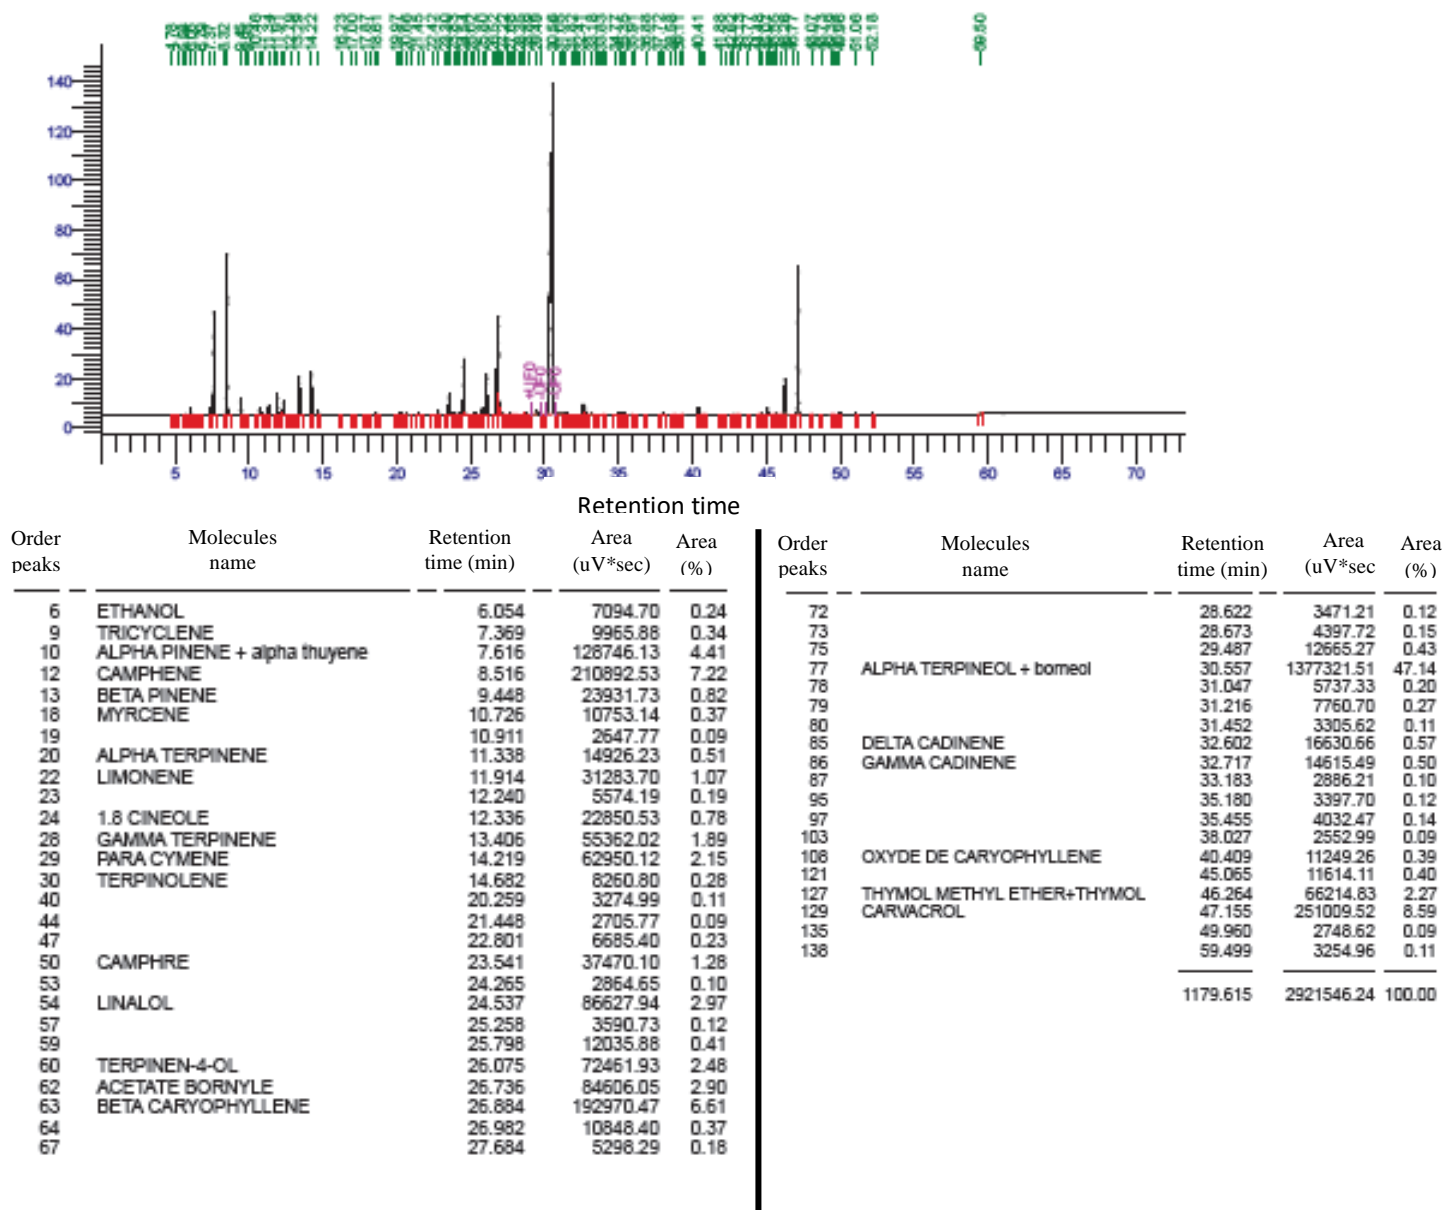

- Nonpolar column analysis results**

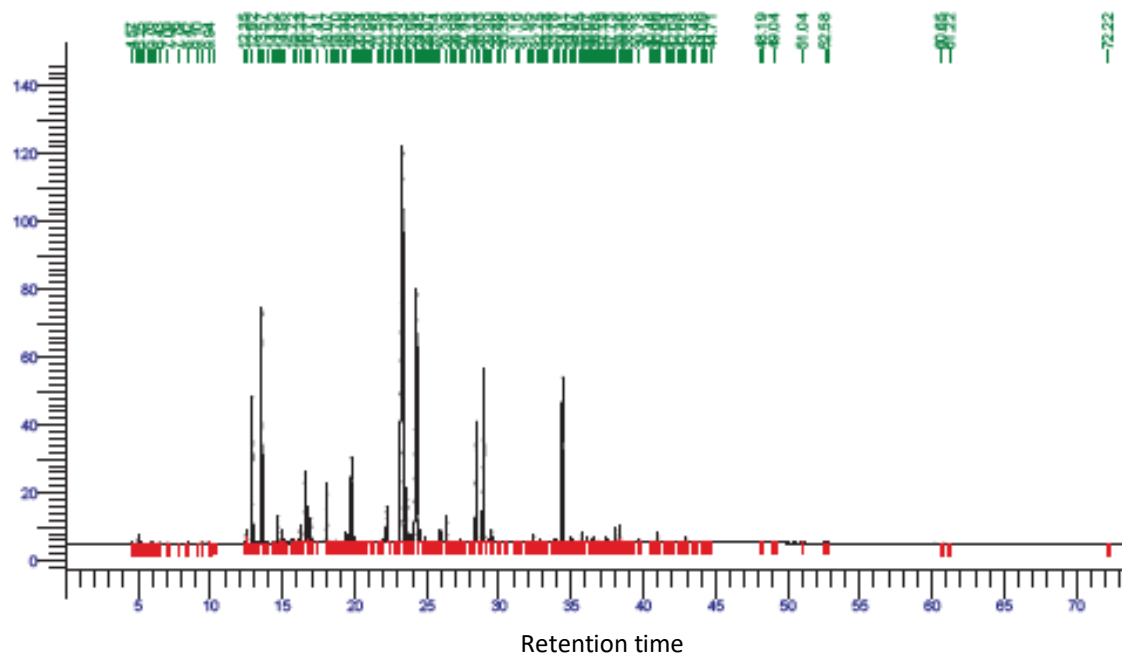

| Order peaks | Molecules name  | Retention time (min) | Area (uV*sec) | Area (%) | Order peaks | Molecules name           | Retention time (min) | Area (uV*sec) | Area (%) |
|-------------|-----------------|----------------------|---------------|----------|-------------|--------------------------|----------------------|---------------|----------|
| 3           | ETHANOL         | 5.014                | 5059.16       | 0.17     | 44          | GAMMA TERPINENE          | 18.070               | 53448.21      | 1.83     |
| 21          | TRICYCLEN       | 12.492               | 9749.14       | 0.33     | 51          | TERPINOLENE              | 19.424               | 12054.45      | 0.41     |
| 22          | ALPHA THUYENE   | 12.550               | 7304.25       | 0.25     | 52          | LINALOL                  | 19.784               | 85282.77      | 2.92     |
| 24          | ALPHA PINENE    | 12.915               | 120496.01     | 4.12     | 53          |                          | 19.982               | 6941.29       | 0.24     |
| 26          | CAMPHENE        | 13.574               | 212341.40     | 7.26     | 64          |                          | 21.930               | 3976.25       | 0.14     |
| 31          | BETA PINENE     | 14.680               | 22948.70      | 0.78     | 65          | CAMPHERE                 | 22.242               | 37158.00      | 1.27     |
| 33          | MYRCENE         | 14.949               | 10346.93      | 0.35     | 70          | BORNEOL                  | 23.339               | 932162.15     | 31.88    |
| 34          |                 | 15.105               | 2665.07       | 0.09     | 71          | TERPINEN-4-OL            | 23.639               | 54082.31      | 1.85     |
| 36          |                 | 15.719               | 3331.22       | 0.11     | 73          |                          | 23.951               | 12391.28      | 0.42     |
| 38          | ALPHA TERPINENE | 16.229               | 14216.65      | 0.49     | 74          | ALPHA TERPINEOL          | 24.308               | 466443.32     | 15.95    |
| 39          | PARA CYMENE     | 16.580               | 62538.70      | 2.14     | 76          |                          | 24.527               | 11005.95      | 0.38     |
| 40          | LIMONENE        | 16.771               | 31166.63      | 1.07     | 78          |                          | 24.893               | 4514.00       | 0.15     |
| 41          |                 | 16.847               | 3899.89       | 0.13     | 85          |                          | 25.939               | 11722.05      | 0.40     |
| 42          | 1.8 CINEOLE     | 16.975               | 21380.12      | 0.73     | 86          | THYMOL METHYL ETHER      | 26.378               | 24022.21      | 0.82     |
|             |                 |                      |               |          | 90          |                          | 27.311               | 3788.42       | 0.13     |
|             |                 |                      |               |          | 94          | ACETATE BORNYLE + THYMOL | 28.431               | 132755.89     | 4.54     |
|             |                 |                      |               |          | 96          | CARVACROL                | 28.975               | 252284.74     | 8.63     |
|             |                 |                      |               |          | 98          |                          | 29.297               | 4294.88       | 0.15     |
|             |                 |                      |               |          | 99          |                          | 29.497               | 11246.06      | 0.38     |
|             |                 |                      |               |          | 109         |                          | 32.398               | 6204.34       | 0.21     |
|             |                 |                      |               |          | 116         |                          | 33.896               | 2856.04       | 0.10     |
|             |                 |                      |               |          | 118         | TRANS BETA CARYOPHYLLENE | 34.413               | 193689.83     | 6.62     |
|             |                 |                      |               |          | 120         |                          | 34.972               | 5691.97       | 0.19     |
|             |                 |                      |               |          | 124         |                          | 35.757               | 9420.71       | 0.32     |
|             |                 |                      |               |          | 126         |                          | 36.074               | 4891.25       | 0.17     |
|             |                 |                      |               |          | 129         |                          | 36.532               | 4701.20       | 0.16     |
|             |                 |                      |               |          | 136         |                          | 37.455               | 4538.33       | 0.16     |
|             |                 |                      |               |          | 140         | GAMMA CADINENE           | 38.081               | 13674.37      | 0.47     |
|             |                 |                      |               |          | 141         | DELTA CADINENE           | 38.355               | 13002.49      | 0.44     |
|             |                 |                      |               |          | 151         | OXYDE DE CARYOPHYLLENE   | 40.986               | 10665.14      | 0.36     |
|             |                 |                      |               |          | 161         |                          | 42.936               | 7401.58       | 0.25     |
|             |                 |                      |               |          |             |                          | 1104.173             | 2923755.33    | 100.00   |
